# Supplementary material for: Cobalt-doped praseodymium ortho ferrite as a promising nanomaterial for carbon dioxide gas sensing
Source: Royal Society of Chemistry journal article supplement (doi:10.1039/d3tc03133k), 2023-01-01
Supplement: d3tc03133k1.pdf [file d3tc03133k1.pdf]

00-047-0065

Dec 4, 2021 3:36 PM (XRD)

**Status** Primary **Quality Mark:** Star **Environment:** Ambient **Temp:** 298.0 K (Assigned by ICDD editor)

**Chemical Formula:** Pr Fe O<sub>3</sub> **Empirical Formula:** Fe O<sub>3</sub> Pr **Weight %:** Fe22.82 O19.61 Pr57.57

**Atomic %:** Fe20.00 O60.00 Pr20.00 **Compound Name:** Iron Praseodymium Oxide **Entry Date:** 09/01/1997

**Radiation:** CuKα1 (1.5406 Å) **Filter:** Graph Mono **Internal Standard:** Si **d-Spacing:** Diffractometer **Cutoff:** 15.00 Å  
**Intensity:** Diffractometer - Peak

**Crystal System:** Orthorhombic **SPGR:** Pbnm (62)

**Author's Unit Cell [ a: 5.484(1) Å b: 5.5787(1) Å c: 7.7879(2) Å Volume: 238.26 Å<sup>3</sup> Z: 4.00**

**MolVol:** 59.56 **c/a:** 1.420 **a/b:** 0.983 **c/b:** 1.396 ] **Calculated Density:** 6.823 g/cm<sup>3</sup> **Color:** Dark reddish brown

**SS/FOM:** F(30) = 154.4(0.0061, 32)

**Space Group:** Pnma (62) **Molecular Weight:** 244.75 g/mol

**Crystal Data [ a: 5.579 Å b: 7.788 Å c: 5.484 Å α: 90.00° β: 90.00° γ: 90.00° XtlCell Vol: 238.26 Å<sup>3</sup>**

**XtlCell Z: 4.00 c/a: 0.983 a/b: 0.716 c/b: 0.704 ]**

**Reduced Cell [ a: 5.484 Å b: 5.579 Å c: 7.788 Å α: 90.00° β: 90.00° γ: 90.00° RedCell Vol: 238.26 Å<sup>3</sup> ]**

**Crystal (Symmetry Allowed):** Centrosymmetric

**Subfiles:** Ceramic (Perovskite), Inorganic, Thermoelectric Material **Pearson Symbol:** oP 20.00

**Prototype Structure [Formula Order]:** Gd Fe O<sub>3</sub> **Prototype Structure [Alpha Order]:** Fe Gd O<sub>3</sub>

**LPF Prototype Structure [Formula Order]:** Gd Fe O<sub>3</sub>,oP20,62

**LPF Prototype Structure [Alpha Order]:** Fe Gd O<sub>3</sub>,oP20,62

**Cross-Ref PDF #'s:** 00-015-0134 (Deleted)

**References:**

| Type              | DOI | Reference                                                                                  |
|-------------------|-----|--------------------------------------------------------------------------------------------|
| Primary Reference |     | Parks, J., McCarthy, G., North Dakota State Univ., Fargo, ND, USA. ICDD Grant-in-Aid 1993. |

**Database Comments:** Additional Patterns: To replace 00-015-0134. General Comments: Average relative standard deviation in intensity of the 10 strongest reflections for 3 specimen mounts = 1.6%. Trace impurity from starting materials present in sample. Validated with the aid of a calculated pattern. Sample Preparation: Prepared by firing "Pr6 O11" and "Fe2 O3" in a 1:3 molar ratio for 48 hours at 1200 C. Unit Cell Data Source: Powder Diffraction.

**d-Spacings (81) - Pr Fe O<sub>3</sub> - 00-047-0065 (Stick, Fixed Slit Intensity) - Cu Kα1 1.54056 Å**

| 2θ (°)   | d (Å)           | I   | h | k | l | * | 2θ (°)   | d (Å)    | I   | h | k | l | * |
|----------|-----------------|-----|---|---|---|---|----------|----------|-----|---|---|---|---|
| 19.79651 | 4.481000        | 1   | 1 | 0 | 1 |   | 58.08127 | 1.586800 | 23m | 3 | 1 | 2 |   |
| 22.73525 | 3.908000        | 20  | 1 | 1 | 0 |   | 59.09811 | 1.561900 | 2   | 2 | 2 | 3 |   |
| 22.83591 | 3.891000        | 15  | 0 | 0 | 2 |   | 60.51832 | 1.528600 | <1  | 3 | 2 | 0 |   |
| 25.47186 | 3.494000        | 9   | 1 | 1 | 1 |   | 61.35705 | 1.509700 | <1  | 2 | 3 | 1 |   |
| 32.06529 | <b>2.789000</b> | 24  | 0 | 2 | 0 |   | 61.89792 | 1.497800 | <1  | 1 | 0 | 5 |   |
| 32.42351 | <b>2.759000</b> | 100 | 1 | 1 | 2 |   | 63.81730 | 1.457300 | 3   | 1 | 3 | 3 |   |
| 32.63013 | <b>2.742000</b> | 29  | 2 | 0 | 0 |   | 64.31594 | 1.447200 | 1   | 1 | 1 | 5 |   |
| 34.11464 | 2.626000        | 5   | 0 | 2 | 1 |   | 64.50070 | 1.443500 | <1  | 3 | 1 | 3 |   |
| 36.10004 | 2.486000        | <1  | 1 | 2 | 0 |   | 67.04863 | 1.394700 | 1   | 0 | 4 | 0 |   |
| 36.47960 | 2.461000        | <1  | 2 | 1 | 0 |   | 67.88156 | 1.379600 | 9   | 2 | 2 | 4 |   |
| 37.96595 | 2.368000        | <1  | 1 | 2 | 1 |   | 68.26400 | 1.372800 | 3   | 0 | 4 | 1 |   |
| 38.31884 | 2.347000        | 3m  | 1 | 0 | 3 |   | 68.38305 | 1.370700 | 3   | 4 | 0 | 0 |   |
| 38.31884 | 2.347000        | 3m  | 2 | 1 | 1 |   | 69.00247 | 1.359900 | <1  | 0 | 2 | 5 |   |
| 39.70862 | 2.268000        | 8   | 0 | 2 | 2 |   | 69.50448 | 1.351300 | <1  | 1 | 4 | 0 |   |
| 40.18884 | 2.242000        | 11  | 2 | 0 | 2 |   | 70.70319 | 1.331300 | <1m | 1 | 4 | 1 |   |
| 41.72378 | 2.163000        | 3   | 1 | 1 | 3 |   | 70.70319 | 1.331300 | <1m | 4 | 1 | 0 |   |
| 43.12304 | 2.096000        | 1   | 1 | 2 | 2 |   | 71.17060 | 1.323700 | <1  | 2 | 3 | 3 |   |
| 43.47156 | 2.080000        | <1  | 2 | 1 | 2 |   | 71.40684 | 1.319900 | <1  | 1 | 2 | 5 |   |
| 46.39030 | 1.955700        | 21  | 2 | 2 | 0 |   | 71.64479 | 1.316100 | <1  | 2 | 1 | 5 |   |
| 46.59966 | 1.947400        | 10  | 0 | 0 | 4 |   | 71.87183 | 1.312500 | <1m | 0 | 4 | 2 |   |
| 47.82569 | 1.900300        | 6   | 0 | 2 | 3 |   | 71.87183 | 1.312500 | <1m | 4 | 1 | 1 |   |
| 47.92752 | 1.896500        | 5   | 2 | 2 | 1 |   | 72.28576 | 1.306000 | <1  | 1 | 3 | 4 |   |
| 50.80594 | 1.795600        | <1  | 1 | 2 | 3 |   | 72.43992 | 1.303600 | <1  | 3 | 3 | 0 |   |
| 51.07717 | 1.786700        | 1   | 2 | 1 | 3 |   | 72.80244 | 1.298000 | 1   | 0 | 0 | 6 |   |
| 51.87756 | 1.761000        | <1  | 1 | 3 | 0 |   | 72.91981 | 1.296200 | 2   | 3 | 1 | 4 |   |
| 52.31178 | 1.747400        | 3   | 2 | 2 | 2 |   | 73.12293 | 1.293100 | 1   | 4 | 0 | 2 |   |
| 52.45712 | 1.742900        | 4   | 1 | 1 | 4 |   | 73.61284 | 1.285700 | 2   | 3 | 3 | 1 |   |
| 52.63918 | 1.737300        | 2   | 3 | 1 | 0 |   | 76.58035 | 1.243100 | 1   | 2 | 4 | 0 |   |
| 53.28688 | 1.717700        | 7   | 1 | 3 | 1 |   | 77.09357 | 1.236100 | 3   | 3 | 3 | 2 |   |
| 54.05124 | 1.695200        | 1   | 3 | 1 | 1 |   | 77.42010 | 1.231700 | 7   | 1 | 1 | 6 |   |
| 57.37667 | 1.604600        | 9   | 1 | 3 | 2 |   | 77.52465 | 1.230300 | 5   | 4 | 2 | 0 |   |
| 57.69506 | 1.596500        | 9   | 0 | 2 | 4 |   | 77.71212 | 1.227800 | 3   | 2 | 4 | 1 |   |
| 58.08127 | 1.586800        | 23m | 2 | 0 | 4 |   | 78.44151 | 1.218200 | 1   | 2 | 2 | 5 |   |

**00-047-0065**

| <u>2<math>\theta</math> (°)</u> | <u>d (Å)</u> | <u>I</u> | <u>h</u> | <u>k</u> | <u>l</u> | <u>*</u> |
|---------------------------------|--------------|----------|----------|----------|----------|----------|
| 78.66487                        | 1.215300     | 1        | 4        | 2        | 1        |          |
| 81.13669                        | 1.184400     | <1m      | 2        | 4        | 2        |          |
| 81.13669                        | 1.184400     | <1m      | 4        | 1        | 3        |          |
| 81.79709                        | 1.176500     | <1       | 0        | 2        | 6        |          |
| 82.07658                        | 1.173200     | 1m       | 2        | 0        | 6        |          |
| 82.07658                        | 1.173200     | 1m       | 4        | 2        | 2        |          |
| 82.65075                        | 1.166500     | 2        | 1        | 3        | 5        |          |
| 82.78922                        | 1.164900     | 2        | 3        | 3        | 3        |          |

| <u>2<math>\theta</math> (°)</u> | <u>d (Å)</u> | <u>I</u> | <u>h</u> | <u>k</u> | <u>l</u> | <u>*</u> |
|---------------------------------|--------------|----------|----------|----------|----------|----------|
| 83.26048                        | 1.159500     | <1       | 3        | 1        | 5        |          |
| 85.59028                        | 1.133800     | 1        | 0        | 4        | 4        |          |
| 86.80772                        | 1.121000     | 3m       | 2        | 4        | 3        |          |
| 86.80772                        | 1.121000     | 3m       | 4        | 0        | 4        |          |
| 87.70790                        | 1.111800     | 1        | 4        | 2        | 3        |          |
| 89.66907                        | 1.092500     | <1       | 4        | 3        | 1        |          |
| 89.81535                        | 1.091100     | <1       | 3        | 2        | 5        |          |

Dec 4, 2021 3:36 PM (XRD)
